# Supplementary material
Source: PubMed Central journal article supplement (PMC6933508)
Supplement: awz022_supplementary_material.pdf [file awz022_supplementary_material.pdf]

## **Supplementary Material:**

Figure S1: Gating strategy

Figure S2: EN components in patients one year after stroke compared to a control cohort

Figure S3: Stroke to surgery comparison

Figure S4: Correlation of EN values and stroke size

Table S1: Population characteristics of control cohort

Table S2: Antibody Panel used for Mass Cytometry analysis

Table S3: Features of the Acute Phase Model ranked by p-value

Table S4: Features of the Intermediate Phase Model ranked by p-value

Table S5: Features of the Late Phase Model ranked by p-value

Table S6:  $\Delta$ MoCA and Acute EN Model Value remain significant when controlling for potential confounders

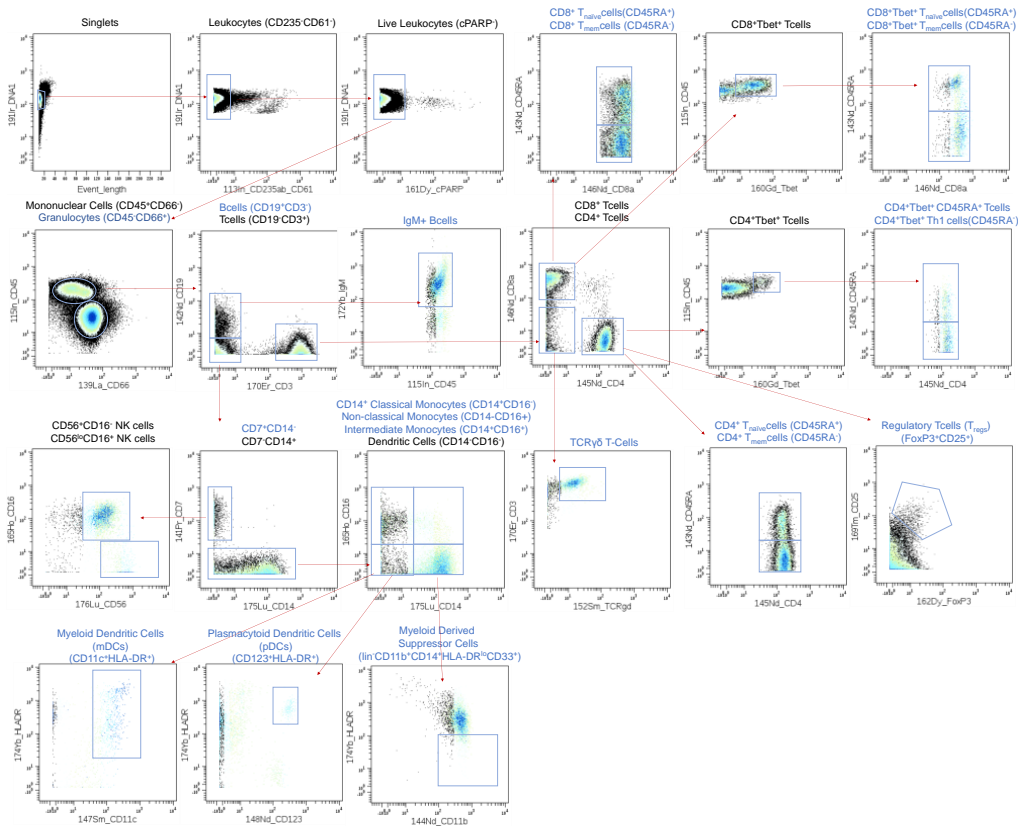

**Figure S1. Gating Strategy.** Two-dimensional dot plots are shown for a representative patient sample. Gating was performed using Cytobank ([www.cytobank.org](http://www.cytobank.org)). Twenty innate and adaptive cell types were manually gated and included in the analysis.

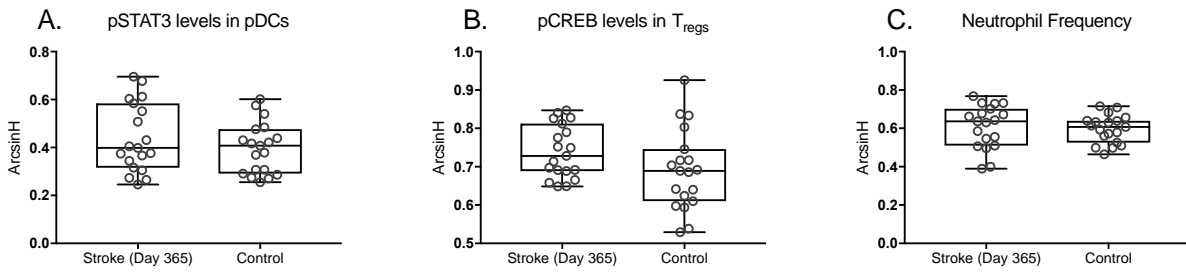

**Figure S2. EN components in patients one year after stroke compared to a control cohort.**

The most prominent immune features of the (A) acute phase, (B) intermediate phase, and (C) late phase models one year after stroke were compared between stroke patients and a sex- and age-matched control cohort. Pre-surgical samples from twenty-four sex- and age-matched patients undergoing primary hip arthroplasty (demographics listed in Supplemental Table S1) were barcoded and stained simultaneously with samples from matched stroke patients, and then analyzed with mass cytometry.

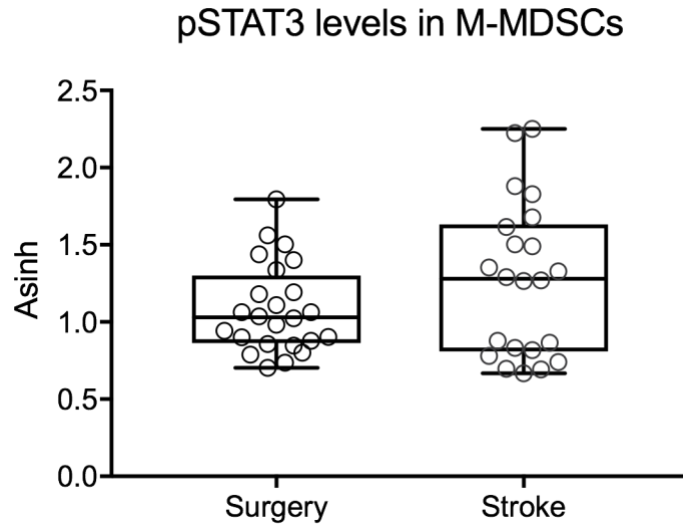

**Figure S3. Stroke to Surgery Comparison.** pSTAT3 levels in M-MDSCs within 24 hours of stroke is comparable to primary hip arthroplasty (PHA). No difference in arcsinh transformed values of pSTAT3 in M-MDSCs between stroke and surgery cohorts were observed.

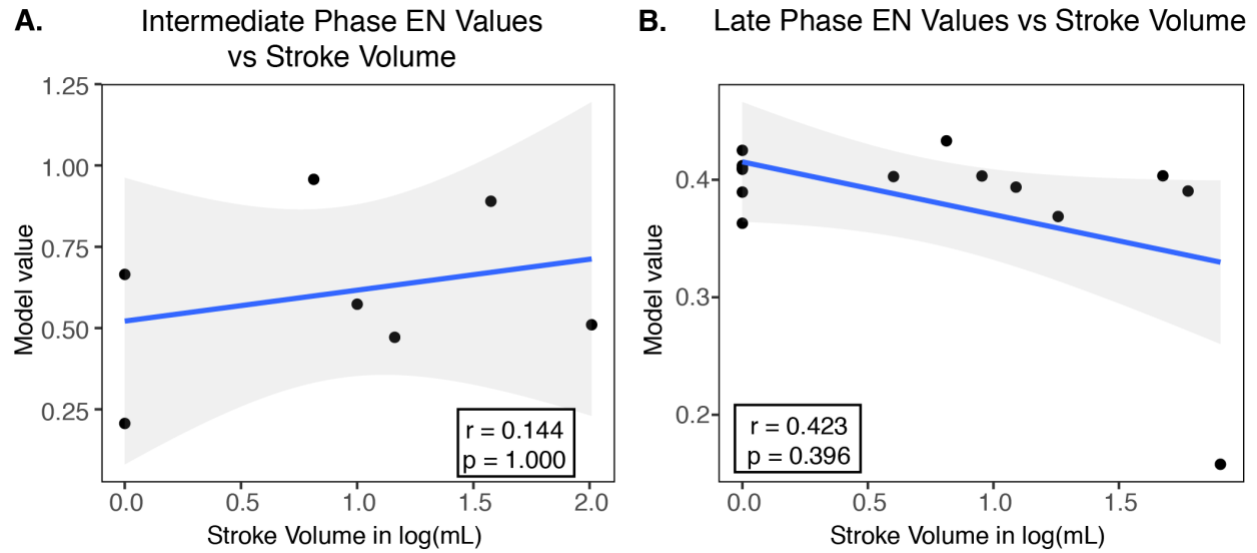

**Figure S4. Correlation of EN Values and Stroke Size.** EN values of the (A) intermediate phase model, and (B) late phase model are plotted against stroke volume (in log(mL)). Non-significant correlation (blue regression line) for the intermediate and late phase model were observed. The 95% confidence intervals are shaded in gray. Spearman coefficients and Bonferroni-corrected p-values are depicted in each plot.

**Supplemental Table S1. Population characteristics of control cohort**

---

***Matched Demographics***

---

|                        |                |
|------------------------|----------------|
| Age (years, mean (SD)) | 63.8 ± 13.3    |
| median (min-max)       | 67.5 (33 – 84) |
| Female sex (%)         | 10 (41.7%)     |

---

**Supplemental Table S2. Antibody Panel used for Mass Cytometry Analysis**

| Antibody                            | Manufacturer              | Atomic Symbol | Atomic Mass | Clone      | Comment   |
|-------------------------------------|---------------------------|---------------|-------------|------------|-----------|
| <b>Barcode 1</b>                    | Trace Sciences            | Pd            | 102         |            | Barcode   |
| <b>Barcode 2</b>                    | Trace Sciences            | Pd            | 104         |            | Barcode   |
| <b>Barcode 3</b>                    | Trace Sciences            | Pd            | 105         |            | Barcode   |
| <b>Barcode 4</b>                    | Trace Sciences            | Pd            | 106         |            | Barcode   |
| <b>Barcode 5</b>                    | Trace Sciences            | Pd            | 108         |            | Barcode   |
| <b>Barcode 6</b>                    | Trace Sciences            | Pd            | 110         |            | Barcode   |
| <b>CD235ab</b>                      | Biolegend                 | In            | 113         | HIR2       | Phenotype |
| <b>CD61</b>                         | BD                        | In            | 113         | VI-PL2     | Phenotype |
| <b>CD45</b>                         | Biolegend                 | In            | 115         | HI30       | Phenotype |
| <b>CD66</b>                         | BD                        | La            | 139         | CD66a-B1.1 | Phenotype |
| <b>CD7</b>                          | BD                        | Pr            | 141         | M-T701     | Phenotype |
| <b>CD19</b>                         | Biolegend                 | Nd            | 142         | HIB19      | Phenotype |
| <b>CD45RA</b>                       | Biolegend                 | Nd            | 143         | HI100      | Phenotype |
| <b>CD11b</b>                        | Fluidigm                  | Nd            | 144         | ICRF44     | Phenotype |
| <b>CD4</b>                          | Fluidigm                  | Nd            | 145         | RPA-T4     | Phenotype |
| <b>CD8a</b>                         | Fluidigm                  | Nd            | 146         | RPA-T8     | Phenotype |
| <b>CD11c</b>                        | Fluidigm                  | Sm            | 147         | Bu15       | Phenotype |
| <b>CD123</b>                        | Biolegend                 | Nd            | 148         | 6H6        | Phenotype |
| <b>pCREB (pS133)</b>                | Cell Signaling Technology | Sm            | 149         | 87G3       | Phenotype |
| <b>pSTAT5 (pY694)</b>               | Fluidigm                  | Nd            | 150         | 47         | Function  |
| <b>pp38 (pT180/pY182)</b>           | BD                        | Eu            | 151         | 36/p38     | Function  |
| <b>TCR<math>\gamma\delta</math></b> | Fluidigm                  | Sm            | 152         | 11F2       | Phenotype |
| <b>pSTAT1 (pY701)</b>               | Fluidigm                  | Eu            | 153         | 58D6       | Function  |
| <b>pSTAT3 (pY705)</b>               | Cell Signaling Technology | Sm            | 154         | M9C6       | Function  |
| <b>pS6 (pS235/pS236)</b>            | Cell Signaling Technology | Gd            | 155         | D57.2.2E   | Function  |
| <b>CD24</b>                         | Biolegend                 | Gd            | 156         | ML5        | Phenotype |
| <b>CD38</b>                         | Biolegend                 | Gd            | 157         | HIT2       | Phenotype |
| <b>CD33</b>                         | Fluidigm                  | Gd            | 158         | WM53       | Phenotype |
| <b>pMAPKAPK2 (pT334)</b>            | Fluidigm                  | Tb            | 159         | 27B7       | Function  |
| <b>Tbet</b>                         | Fluidigm                  | Gd            | 160         | 4B10       | Function  |
| <b>cPARP</b>                        | BD                        | Dy            | 161         | F21-852    | Function  |
| <b>FoxP3</b>                        | Fluidigm                  | Dy            | 162         | PCH101     | Phenotype |
| <b>I<math>\kappa</math>B</b>        | Fluidigm                  | Dy            | 164         | L35A5      | Function  |

|                              |           |    |     |               |           |
|------------------------------|-----------|----|-----|---------------|-----------|
| <b>CD16</b>                  | Fluidigm  | Ho | 165 | 3G8           | Phenotype |
| <b>pNFκB (pS529)</b>         | Fluidigm  | Er | 166 | K10-895.12.50 | Function  |
| <b>pERK1/2 (pT202/pY204)</b> | Fluidigm  | Er | 167 | D13.14.4E     | Function  |
| <b>pSTAT6 (pY641)</b>        | Fluidigm  | Er | 168 | 18            | Function  |
| <b>CD25</b>                  | Biolegend | Tm | 169 | M-A251        | Phenotype |
| <b>CD3</b>                   | Fluidigm  | Er | 170 | UCHT1         | Phenotype |
| <b>CD27</b>                  | BD        | Yb | 171 | M-T271        | Phenotype |
| <b>IgM</b>                   | Fluidigm  | Yb | 172 | MHM-88        | Phenotype |
| <b>CCR2</b>                  | Biolegend | Yb | 173 | K036C2        | Phenotype |
| <b>HLA-DR</b>                | Fluidigm  | Yb | 174 | L243          | Phenotype |
| <b>CD14</b>                  | Fluidigm  | Yb | 175 | M5E2          | Phenotype |
| <b>CD56</b>                  | BD        | Yb | 176 | NCAM16.2      | Phenotype |
| <b>DNA1</b>                  | Fluidigm  | Ir | 191 |               | DNA       |
| <b>DNA2</b>                  | Fluidigm  | Ir | 192 |               | DNA       |

---



**Supplemental Table S3. Features of the Acute Phase Model (Day 2 compared to Day 365).** Immune features that comprise the model were examined individually. Univariate p values were obtained using a Wilcoxon Test to compared each feature are Day 2 to Day 365. Elastic Net coefficients are also listed. Features are listed in order of their respective p-values.

| Feature                                                              | p-value     | Coefficient  |
|----------------------------------------------------------------------|-------------|--------------|
| pDCs_STAT3                                                           | 0.003133012 | 0.038549129  |
| cMC_STAT3                                                            | 0.004932664 | 0.061372167  |
| MDSCs_STAT3                                                          | 0.006404096 | 0.097431805  |
| pDCs Frequency                                                       | 0.011412334 | -0.077135508 |
| Tregs_p38                                                            | 0.015578886 | 0.076230168  |
| CD4 Naive T-Cells_STAT3                                              | 0.015578886 | 0.015834997  |
| CD4 Memory T-Cells_p38                                               | 0.018111611 | 0.053694786  |
| mDCs_STAT3                                                           | 0.019504626 | 0.000710444  |
| CD4 Naive T-Cells_p38                                                | 0.022565919 | 0.074817895  |
| Tbet <sup>+</sup> CD4 <sup>+</sup> CD45RA <sup>-</sup> T-Cells_p38   | 0.026025103 | 0.001699668  |
| ncMC_IkB                                                             | 0.064884401 | 0.060093211  |
| CD7 <sup>+</sup> CD14 <sup>-</sup> Frequency                         | 0.07307725  | -0.000723323 |
| Tbet <sup>+</sup> CD4 <sup>+</sup> CD45RA <sup>+</sup> T-Cells_p38   | 0.086893527 | 0.19071907   |
| Tbet <sup>+</sup> CD8 <sup>+</sup> CD45RA <sup>-</sup> T-Cells_STAT1 | 0.086893527 | -0.073344311 |
| intMC_IkB                                                            | 0.091931    | 0.000221267  |
| Neutrophils_STAT1                                                    | 0.114404566 | -0.015175318 |
| pDCs_ERK                                                             | 0.120633831 | 0.001563947  |
| CD4 Memory T-Cells_STAT5                                             | 0.140880095 | 0.000188092  |
| MDSCs Frequency                                                      | 0.188859351 | 0.00536173   |
| ncMC Frequency                                                       | 0.207207814 | -0.000660488 |
| CD4 Naive T-Cells_STAT5                                              | 0.207207814 | 0.009348159  |
| Tbet <sup>+</sup> CD4 <sup>+</sup> CD45RA <sup>+</sup> T-Cells_STAT3 | 0.207207814 | 0.000106293  |
| intMC_MAPKAPK2                                                       | 0.207207814 | -0.025039915 |
| Tbet <sup>+</sup> CD4 <sup>+</sup> CD45RA <sup>-</sup> T-Cells_IkB   | 0.226785775 | 0.000115791  |
| CD8 Memory T-Cells_STAT3                                             | 0.269721336 | 0.00414818   |
| CD7 <sup>+</sup> CD14 <sup>-</sup> _STAT1                            | 0.281254777 | -0.046404005 |
| Tbet <sup>+</sup> CD4 <sup>+</sup> CD45RA <sup>+</sup> T-Cells_IkB   | 0.281254777 | 0.000319841  |
| CD7 <sup>+</sup> CD14 <sup>-</sup> _STAT5                            | 0.317792372 | -0.026712474 |

---

|                                                                          |             |              |
|--------------------------------------------------------------------------|-------------|--------------|
| intMC_p38                                                                | 0.343766483 | -0.120822548 |
| Tregs_ERK                                                                | 0.385134537 | 0.07345742   |
| intMC Frequency                                                          | 0.399558376 | 0.009699213  |
| intMC_STAT5                                                              | 0.399558376 | 0.003371477  |
| Neutrophils_MAPKAPK2                                                     | 0.399558376 | -0.014446278 |
| B-Cells_STAT1                                                            | 0.414295027 | -0.000774053 |
| IgM+ B-Cells                                                             | 0.429341175 | 0.000186084  |
| ncMC_STAT5                                                               | 0.429341175 | 0.055855695  |
| Tregs_S6                                                                 | 0.429341175 | 0.003275702  |
| ncMC_p38                                                                 | 0.444692966 | 0.048603638  |
| Tbet <sup>+</sup> CD4 <sup>+</sup> CD45RA <sup>-</sup> T-Cells_ERK       | 0.476295895 | 0.004026225  |
| intMC_CREB                                                               | 0.509063783 | -0.002349003 |
| CD8 Memory T-Cells_STAT5                                                 | 0.509063783 | 0.000126256  |
| Tbet <sup>+</sup> CD8 <sup>+</sup> CD45RA <sup>+</sup> T-Cells_STAT1     | 0.509063783 | -0.009157675 |
| IgM+ B-Cells_ERK                                                         | 0.509063783 | -0.000715586 |
| Neutrophils_p38                                                          | 0.525870025 | -0.036842249 |
| Tbet <sup>+</sup> CD4 <sup>+</sup> CD45RA <sup>-</sup> T-Cells_S6        | 0.525870025 | 0.031734521  |
| CD8 Naive T-Cells_MAPKAPK2                                               | 0.542949072 | -8.57E-05    |
| Tregs_MAPKAPK2                                                           | 0.542949072 | 0.013092869  |
| mDCs_CREB                                                                | 0.560293861 | -0.000996989 |
| Tbet <sup>+</sup> CD4 <sup>+</sup> CD45RA <sup>-</sup> T-Cells Frequency | 0.59574995  | -3.73E-05    |
| TCRgd T-cells_CREB                                                       | 0.59574995  | -0.001000404 |
| TCRgd T-cells_STAT5                                                      | 0.59574995  | 0.000938858  |
| cMC_STAT5                                                                | 0.59574995  | 0.028933424  |
| B-Cells_MAPKAPK2                                                         | 0.613844833 | 0.031897358  |
| intMC_pSTAT6                                                             | 0.613844833 | 0.024428588  |
| B-Cells_STAT5                                                            | 0.650724095 | -0.00165113  |
| Tbet <sup>+</sup> CD8 <sup>+</sup> CD45RA <sup>-</sup> T-Cells_MAPKAPK2  | 0.650724095 | -0.009723011 |
| Tbet <sup>+</sup> CD8 <sup>+</sup> CD45RA <sup>+</sup> T-Cells_MAPKAPK2  | 0.688458983 | -0.000284972 |
| Tbet <sup>+</sup> CD4 <sup>+</sup> CD45RA <sup>+</sup> T-Cells_ERK       | 0.707621985 | 0.000474064  |
| Tbet <sup>+</sup> CD8 <sup>+</sup> CD45RA <sup>+</sup> T-Cells_CREB      | 0.726967778 | -0.00907308  |
| IgM+ B-Cells_STAT1                                                       | 0.726967778 | -0.000816286 |

---

---

|                                                                          |             |              |
|--------------------------------------------------------------------------|-------------|--------------|
| ncMC_pSTAT6                                                              | 0.726967778 | -0.000916305 |
| ncMC_STAT1                                                               | 0.746485315 | 0.00077333   |
| IgM <sup>+</sup> B-Cells_CREB                                            | 0.785989639 | -0.001316337 |
| CD8 Naive T-Cells_CREB                                                   | 0.785989639 | -0.000249306 |
| Tbet <sup>+</sup> CD4 <sup>+</sup> CD45RA <sup>+</sup> T-Cells_CREB      | 0.785989639 | -0.000112572 |
| Neutrophils_NFkB                                                         | 0.785989639 | -0.000402312 |
| CD8 Naive T-Cells Frequency                                              | 0.805952757 | -0.002680539 |
| Tbet <sup>+</sup> CD4 <sup>+</sup> CD45RA <sup>+</sup> T-Cells Frequency | 0.846239828 | -0.000302871 |
| CD7 <sup>+</sup> CD14 <sup>-</sup> _CREB                                 | 0.846239828 | -9.65E-05    |
| CD4 Memory T-Cells_S6                                                    | 0.846239828 | 0.002883853  |
| cMC_MAPKAPK2                                                             | 0.866538653 | -0.001467536 |
| pDCs_pSTAT6                                                              | 0.866538653 | 0.016482314  |
| Tregs_pSTAT6                                                             | 0.886923897 | 1.67E-05     |
| Neutrophils_S6                                                           | 0.907382582 | 0.000283116  |
| B-Cells_S6                                                               | 0.907382582 | 2.01E-05     |
| TCRgd T-cells Frequency                                                  | 0.927901509 | -0.01123539  |
| B-Cells_CREB                                                             | 0.927901509 | -0.098458215 |
| pDCs_STAT5                                                               | 0.927901509 | 0.001733622  |
| MDSCs_p38                                                                | 0.927901509 | -4.98E-06    |
| CD7 <sup>+</sup> CD14 <sup>-</sup> _MAPKAPK2                             | 0.948467446 | 0.012440116  |
| MDSCs_MAPKAPK2                                                           | 0.948467446 | -0.003048691 |
| CD8 Naive T-Cells_STAT1                                                  | 0.969066991 | -0.019907989 |
| CD8 Naive T-Cells_pSTAT6                                                 | 0.989686757 | -0.001096702 |
| MDSCs_STAT5                                                              | 1           | 0.002683005  |

---

**Supplemental Table S4: Features of the Intermediate Phase Model (Day 5 compared to Day 365).** Immune features that comprise the model were examined individually. Univariate p values were obtained using a Wilcoxon Test to compared each feature are Day 5 to Day 365. Elastic Net coefficients are also listed. Features are listed in order of their respective p-values.

| Feature                                                             | p-value     | Coefficient  |
|---------------------------------------------------------------------|-------------|--------------|
| Tregs_CREB                                                          | 2.13E-05    | 0.059320858  |
| Tbet <sup>+</sup> CD4 <sup>+</sup> CD45RA <sup>-</sup> T-Cells_CREB | 0.000747948 | 0.046199462  |
| CD4 Memory T-Cells_p38                                              | 0.002824567 | 0.027898062  |
| Tbet <sup>+</sup> CD8 <sup>+</sup> CD45RA <sup>-</sup> T-Cells_CREB | 0.003578595 | 0.022315452  |
| Tbet <sup>+</sup> CD4 <sup>+</sup> CD45RA <sup>+</sup> T-Cells_CREB | 0.003578595 | 0.005834086  |
| Tbet <sup>+</sup> CD4 <sup>+</sup> CD45RA <sup>-</sup> T-Cells_p38  | 0.004490727 | 0.034782437  |
| TCRgd T-cells_CREB                                                  | 0.004490727 | 0.000129622  |
| Tregs_STAT3                                                         | 0.005594406 | 0.038059203  |
| CD4 Memory T-Cells_CREB                                             | 0.018072362 | 0.005561427  |
| CD8 Memory T-Cells_CREB                                             | 0.018072362 | 0.000680663  |
| Tregs_p38                                                           | 0.021511098 | 0.018159412  |
| CD4 Naive T-Cells_STAT3                                             | 0.025472788 | 0.05825626   |
| Tbet <sup>+</sup> CD4 <sup>+</sup> CD45RA <sup>+</sup> T-Cells_CREB | 0.025472788 | 0.029355302  |
| CD8 Naive T-Cells_CREB                                              | 0.03        | 0.05029409   |
| MDSCs_MAPKAPK2                                                      | 0.035165704 | 0.000240364  |
| MDSCs Frequency                                                     | 0.047622378 | 0.042954218  |
| Tregs_IkB                                                           | 0.047622378 | 0.013221894  |
| CD4 Memory T-Cells_STAT3                                            | 0.055041046 | 0.031831157  |
| MDSCs_ERK                                                           | 0.063347522 | 0.001392671  |
| CD7 <sup>+</sup> CD14 <sup>-</sup> _STAT5                           | 0.072593493 | -0.021543278 |
| TCRgd T-cells_p38                                                   | 0.072593493 | 0.008354608  |
| pDCs_STAT3                                                          | 0.072593493 | 0.000337684  |
| mDCs_S6                                                             | 0.082861052 | 0.010324231  |
| CD8 Memory T-Cells Frequency                                        | 0.082861052 | -0.005724106 |
| mDCs_MAPKAPK2                                                       | 0.082861052 | -0.000780269 |
| ncMC_IkB                                                            | 0.094198845 | 0.029766859  |
| CD4 Naive T-Cells_CREB                                              | 0.094198845 | 0.002244352  |
| CD7 <sup>+</sup> CD14 <sup>-</sup> _STAT1                           | 0.106682882 | -0.061480772 |
| MDSCs_S6                                                            | 0.106682882 | 0.030462202  |
| cMC_p38                                                             | 0.106682882 | -0.008046741 |

|                                                                      |             |              |
|----------------------------------------------------------------------|-------------|--------------|
| ncMC_p38                                                             | 0.106682882 | 0.002465176  |
| Tregs_STAT1                                                          | 0.106682882 | 0.000606465  |
| pDCs_p38                                                             | 0.106682882 | 0.000488953  |
| CD4 Naive T-Cells_p38                                                | 0.106682882 | 0.000282637  |
| Tbet <sup>+</sup> CD4 <sup>+</sup> CD45RA <sup>-</sup> T-Cells_p38   | 0.120364853 | 0.041404482  |
| Neutrophils_STAT5                                                    | 0.120364853 | -0.005606854 |
| CD4 Memory T-Cells_IkB                                               | 0.120364853 | 6.49E-05     |
| Neutrophils_STAT1                                                    | 0.151571906 | -0.020478172 |
| Tbet <sup>+</sup> CD4 <sup>+</sup> CD45RA <sup>-</sup> T-Cells_IkB   | 0.151571906 | 0.011592994  |
| cMC_MAPKAPK2                                                         | 0.151571906 | -0.006708648 |
| B-Cells_CREB                                                         | 0.151571906 | -0.005238393 |
| intMC_p38                                                            | 0.151571906 | -0.002517416 |
| MDSCs_IkB                                                            | 0.151571906 | 5.21E-05     |
| CD4 Naive T-Cells_IkB                                                | 0.169206446 | 0.00051692   |
| Tregs_MAPKAPK2                                                       | 0.188245667 | 0.049893203  |
| Tbet <sup>+</sup> CD4 <sup>+</sup> CD45RA <sup>+</sup> T-Cells       | 0.188245667 | 0.03327968   |
| ncMC Frequency                                                       | 0.188245667 | -0.006547156 |
| cMC_S6                                                               | 0.188245667 | 0.000285258  |
| Tbet <sup>+</sup> CD4 <sup>+</sup> CD45RA <sup>+</sup> T-Cells_IkB   | 0.208741259 | 0.003817205  |
| intMC_CREB                                                           | 0.208741259 | -0.00211248  |
| CD8 Naive T-Cells_MAPKAPK2                                           | 0.230717543 | -0.00234361  |
| CD7 <sup>+</sup> CD14 <sup>-</sup> _STAT3                            | 0.254211006 | -0.032133338 |
| Tregs_S6                                                             | 0.254211006 | 0.013506835  |
| CD8 Naive T-Cells_p38                                                | 0.279224688 | -0.000325586 |
| CD8 Naive T-Cells_STAT3                                              | 0.279224688 | 0.00021398   |
| Tbet <sup>+</sup> CD4 <sup>+</sup> CD45RA <sup>-</sup> T-Cells_STAT3 | 0.305785953 | 0.032523178  |
| intMC_ERK                                                            | 0.305785953 | 0.000742371  |
| Tregs_STAT5                                                          | 0.305785953 | 0.000645723  |
| cMC_STAT1                                                            | 0.333879599 | -0.01397357  |
| Tbet <sup>+</sup> CD8 <sup>+</sup> CD45RA <sup>+</sup> T-Cells_p38   | 0.333879599 | -3.23E-05    |
| TCRgd T-cells Frequency                                              | 0.363505625 | -0.013103192 |
| B-Cells_STAT1                                                        | 0.394639708 | -2.22E-05    |
| CD8 Memory T-Cells_MAPKAPK2                                          | 0.394639708 | -8.22E-06    |
| TCRgd T-cells_STAT1                                                  | 0.427260566 | -0.062700204 |

|                                                                          |             |              |
|--------------------------------------------------------------------------|-------------|--------------|
| CD4 Memory T-Cells_STAT5                                                 | 0.427260566 | 0.001007083  |
| mDCs_STAT3                                                               | 0.427260566 | 0.000280909  |
| Neutrophils_CREB                                                         | 0.427260566 | -0.000134706 |
| CD4 Naive T-Cells_STAT1                                                  | 0.427260566 | 5.68E-05     |
| Neutrophils_p38                                                          | 0.46131651  | -0.013584413 |
| CD4 Naive T-Cells_STAT5                                                  | 0.46131651  | 0.001662461  |
| Tregs_ERK                                                                | 0.496774095 | 0.017322845  |
| Tbet <sup>+</sup> CD8 <sup>+</sup> CD45RA <sup>-</sup> T-Cells Frequency | 0.496774095 | -0.007929833 |
| pDCs_MAPKAPK2                                                            | 0.496774095 | 0.002550779  |
| IgM <sup>+</sup> B-Cells_NFkB                                            | 0.496774095 | 0.001545001  |
| Neutrophils_IkB                                                          | 0.496774095 | 0.001533564  |
| Tbet <sup>+</sup> CD4 <sup>+</sup> CD45RA <sup>+</sup> T-Cells_MAPKAPK2  | 0.496774095 | 0.001187826  |
| ncMC_S6                                                                  | 0.496774095 | 0.000316704  |
| intMC_MAPKAPK2                                                           | 0.533560353 | -0.015670307 |
| pDCs_STAT1                                                               | 0.533560353 | 0.003556651  |
| ncMC_ERK                                                                 | 0.533560353 | 0.001071799  |
| Tbet <sup>+</sup> CD8 <sup>+</sup> CD45RA <sup>-</sup> T-Cells_STAT5     | 0.571611432 | 0.005429471  |
| CD4 Naive T-Cells Frequency                                              | 0.571611432 | -0.002673417 |
| ncMC_CREB                                                                | 0.571611432 | 0.000318037  |
| Tbet <sup>+</sup> CD4 <sup>+</sup> CD45RA <sup>-</sup> T-Cells_STAT5     | 0.610845242 | 0.022856137  |
| IgM <sup>+</sup> B-Cells_STAT5                                           | 0.610845242 | 0.002243329  |
| Tregs Frequency                                                          | 0.610845242 | 0.001289879  |
| TCRgd T-cells_STAT5                                                      | 0.651176649 | 0.063083984  |
| Neutrophils_NFkB                                                         | 0.651176649 | -0.002815322 |
| B-Cells_p38                                                              | 0.651176649 | -0.000156503 |
| CD7 <sup>+</sup> CD14 <sup>-</sup> Frequency                             | 0.69249924  | 0.043988235  |
| CD4 Memory T-Cells Frequency                                             | 0.69249924  | -0.005856135 |
| ncMC_NFkB                                                                | 0.69249924  | 1.34E-05     |
| TCRgd T-cells_ERK                                                        | 0.73471876  | -0.003519962 |
| Tbet <sup>+</sup> CD4 <sup>+</sup> CD45RA <sup>-</sup> T-Cells_STAT1     | 0.73471876  | 0.000724772  |
| MDSCs_STAT3                                                              | 0.73471876  | 0.000262134  |
| ncMC_STAT3                                                               | 0.777713591 | 0.027820707  |
| mDCs Frequency                                                           | 0.777713591 | -0.015398957 |
| Tbet <sup>+</sup> CD8 <sup>+</sup> CD45RA <sup>-</sup> T-Cells_STAT1     | 0.777713591 | -0.001761404 |

|                                                                          |             |              |
|--------------------------------------------------------------------------|-------------|--------------|
| Tbet <sup>+</sup> CD4 <sup>+</sup> CD45RA <sup>+</sup> T-Cells_STAT5     | 0.777713591 | 0.001041067  |
| Tbet <sup>+</sup> CD8 <sup>+</sup> CD45RA <sup>+</sup> T-Cells Frequency | 0.821365157 | 0.01045509   |
| TCRgd T-cells_pSTAT6                                                     | 0.821365157 | -0.00309783  |
| CD7 <sup>+</sup> CD14 <sup>-</sup> _S6                                   | 0.821365157 | -0.002041832 |
| TCRgd T-cells_STAT3                                                      | 0.821365157 | 0.001741213  |
| ncMC_MAPKAPK2                                                            | 0.821365157 | -5.94E-05    |
| Neutrophils_S6                                                           | 0.865551839 | 0.028926013  |
| IgM <sup>+</sup> B-Cells_S6                                              | 0.865551839 | -0.028793138 |
| B-Cells_S6                                                               | 0.865551839 | -0.026395287 |
| Tbet <sup>+</sup> CD4 <sup>+</sup> CD45RA <sup>-</sup> T-Cells_ERK       | 0.865551839 | 0.018761154  |
| CD8 Naive T-Cells Frequency                                              | 0.865551839 | 0.015877526  |
| Tbet <sup>+</sup> CD8 <sup>+</sup> CD45RA <sup>-</sup> T-Cells_ERK       | 0.865551839 | 0.004538424  |
| CD4 Memory T-Cells_MAPKAPK2                                              | 0.865551839 | 0.000497186  |
| intMC Frequency                                                          | 0.865551839 | 0.00014669   |
| pDCs_pSTAT6                                                              | 0.865551839 | -0.000130589 |
| B-Cells_pSTAT6                                                           | 0.910142901 | -0.021327861 |
| pDCs Frequency                                                           | 0.95500152  | -0.030818702 |
| Tbet <sup>+</sup> CD4 <sup>+</sup> CD45RA <sup>+</sup> T-Cells_STAT3     | 0.95500152  | 0.021317923  |
| CD7 <sup>+</sup> CD14 <sup>-</sup> _p38                                  | 0.95500152  | -0.011736172 |
| intMC_pSTAT6                                                             | 0.95500152  | -0.001650841 |
| ncMC_pSTAT6                                                              | 0.95500152  | 2.50E-05     |
| Tregs_pSTAT6                                                             | 1           | 0.036735403  |
| Tbet <sup>+</sup> CD4 <sup>+</sup> CD45RA <sup>-</sup> T-Cells_pSTAT6    | 1           | 0.010366561  |
| Tbet <sup>+</sup> CD4 <sup>+</sup> CD45RA <sup>-</sup> T-Cells_MAPKAPK2  | 1           | 0.004518351  |
| Tbet <sup>+</sup> CD4 <sup>+</sup> CD45RA <sup>-</sup> T-Cells           | 1           | -0.001121399 |
| IgM <sup>+</sup> B-Cells_pSTAT6                                          | 1           | -0.000506729 |

---

**Supplemental Table S5: Features of the Late Phase Model (Day 90 compared to Day 365).** Immune features that comprise the model were examined individually. Univariate p values were obtained using a Wilcoxon Test to compared each feature are Day 90 to Day 365. Elastic Net coefficients are also listed. Features are listed in order of their respective p-values.

| Feature                                                                 | p-value     | Coefficient  |
|-------------------------------------------------------------------------|-------------|--------------|
| Neutrophil Frequency                                                    | 0.113947274 | -0.023192096 |
| Tbet <sup>+</sup> CD4 <sup>+</sup> CD45RA <sup>-</sup> T-Cells_MAPKAPK2 | 0.270688695 | 0.000140469  |
| pDCs_STAT5                                                              | 0.303720532 | 0.000739524  |
| pDCs_STAT1                                                              | 0.321171628 | 0.005077958  |
| B-Cells_CREB                                                            | 0.357940817 | -0.000272042 |
| IgM+ B-Cells_S6                                                         | 0.653240186 | -0.000108077 |
| IgM+ B-Cells_CREB                                                       | 0.760104029 | -0.000374841 |



**Supplemental Table S6.  $\Delta$ MoCA and Acute EN Model Value remain significant when controlling for potential confounders**

| Controlled Variable     | Correlation | P-value |
|-------------------------|-------------|---------|
| Stroke Volume           | -0.664      | 0.026   |
| Left Hemisphere Lesion  | -0.706      | 0.015   |
| Right Hemisphere Lesion | -0.706      | 0.015   |
| IV-tPA Treatment Only   | -0.708      | 0.015   |
| tPA and IAT Treatment   | -0.691      | 0.019   |
| Fatigue                 | -0.691      | 0.018   |
| CES-D                   | -0.731      | 0.011   |
| BMI                     | -0.699      | 0.017   |
| Age                     | -0.687      | 0.020   |
| Gender                  | -0.691      | 0.019   |
